# Supplementary material
Source: ML conference proceedings conference paper supplement (https://openreview.net/forum?id=x4jPW4p55i)

Proposed

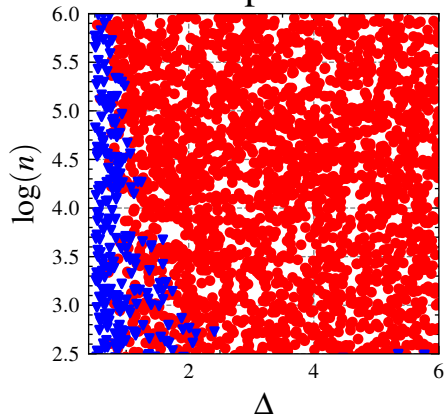

AIC

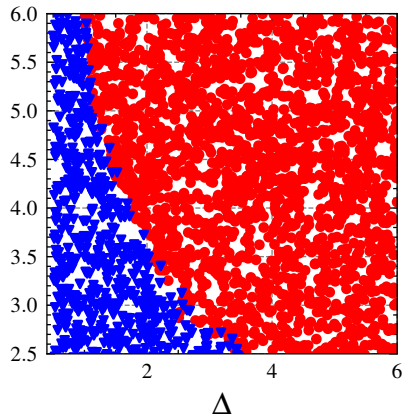

BIC

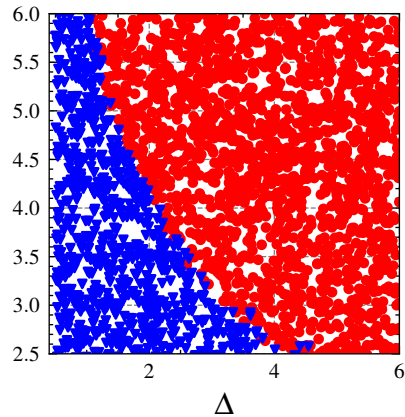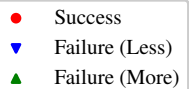

Supplement: supplementary_material [file attachment]

Proposed

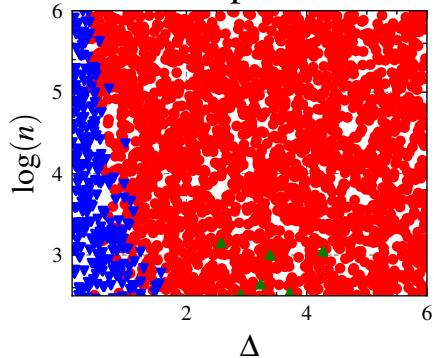

AIC

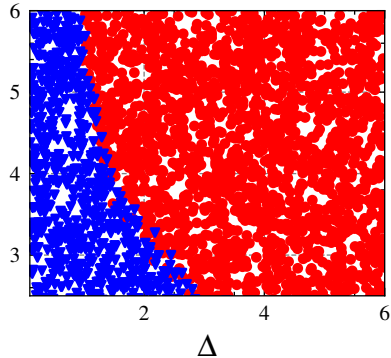

BIC

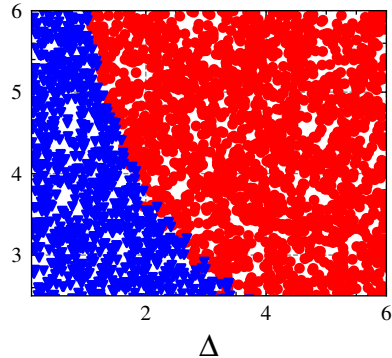

- Success
- ▼ Failure (Less)
- ▲ Failure (More)

Supplement: supplementary_material [file attachment]

Proposed

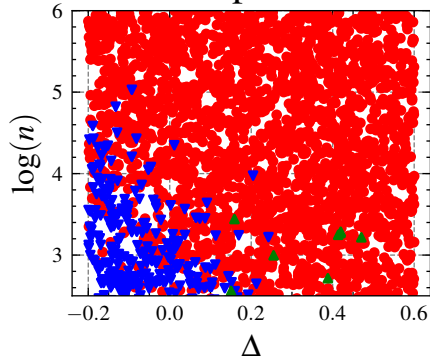

AIC

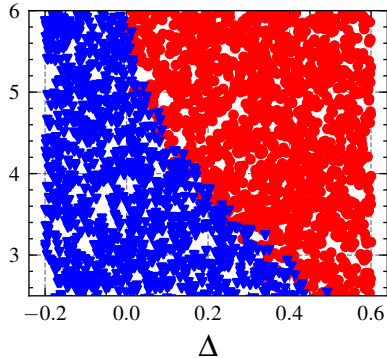

BIC

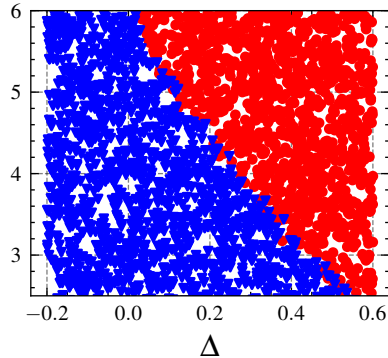

- Success
- ▼ Failure (Less)
- ▲ Failure (More)

Supplement: supplementary_material [file attachment]

Proposed

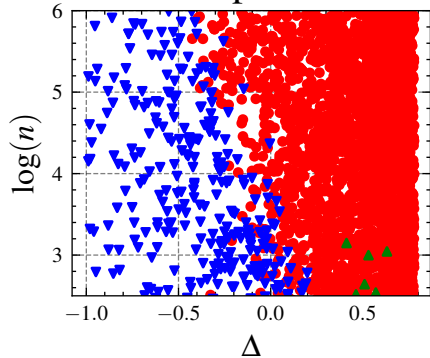

AIC

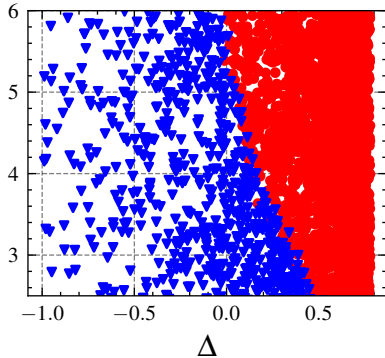

BIC

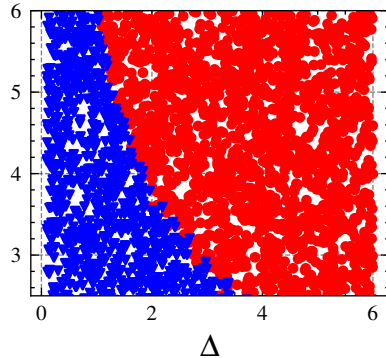

- Success
- ▼ Failure (Less)
- ▲ Failure (More)

Supplement: supplementary_material [file attachment]

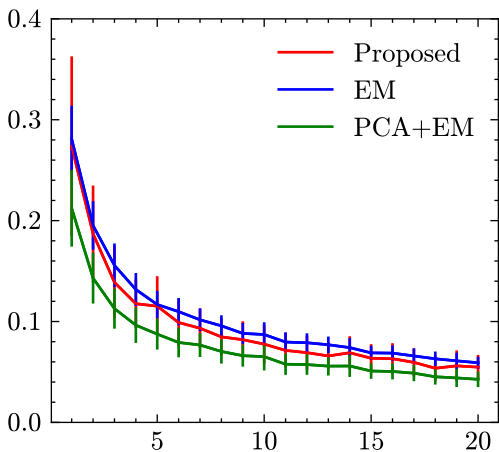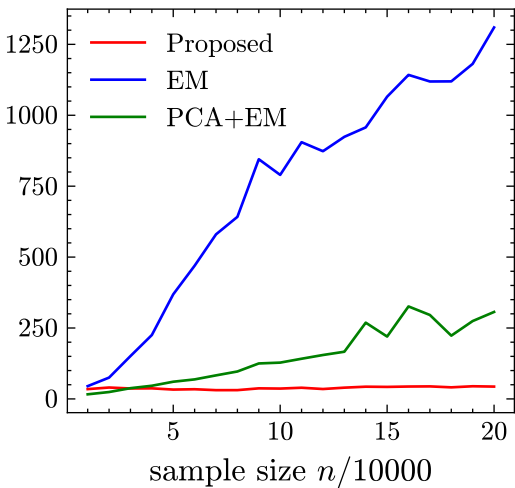

Supplement: supplementary_material [file attachment]

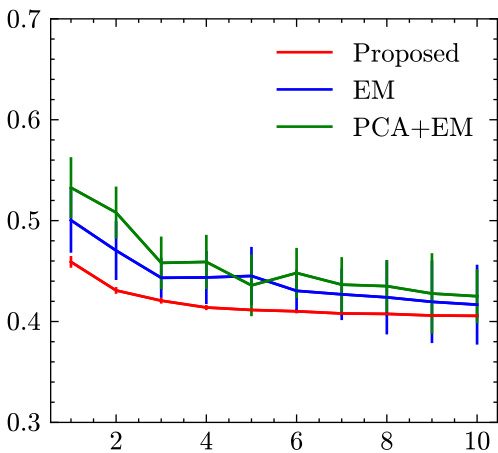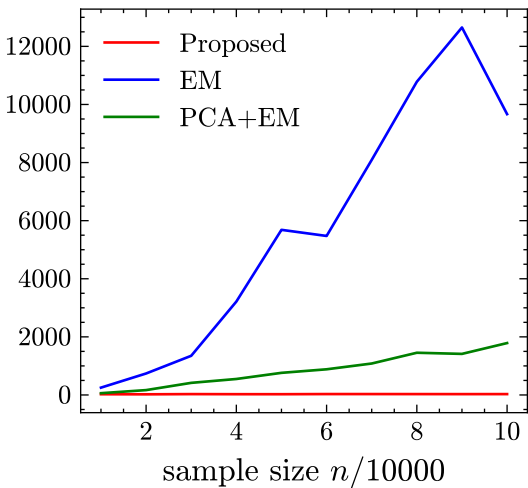

Supplement: supplementary_material [file attachment]

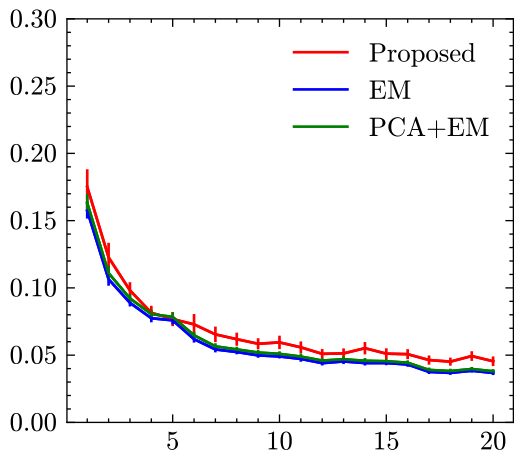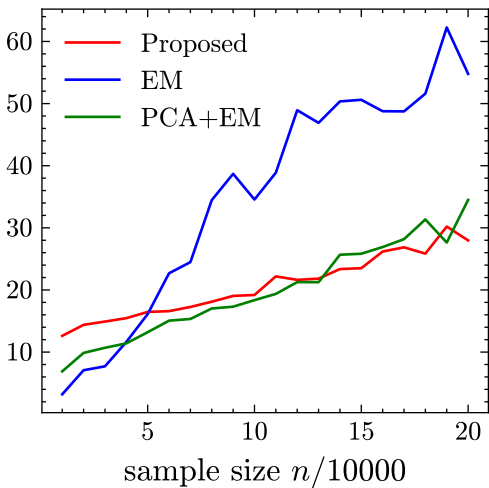

Supplement: supplementary_material [file attachment]

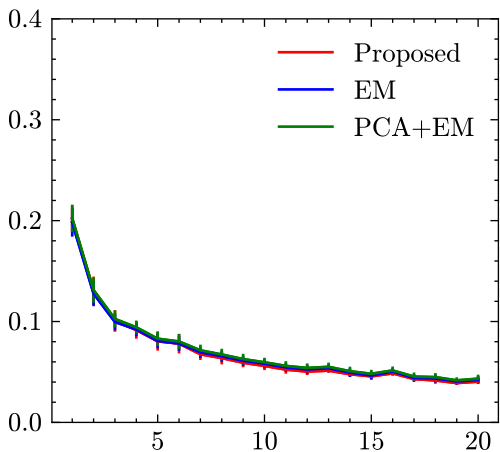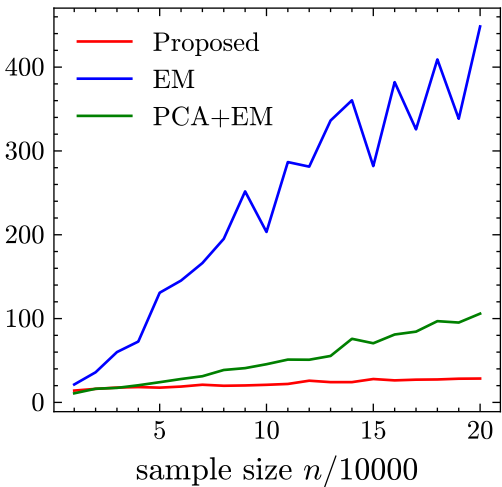

Supplement: supplementary_material [file attachment]

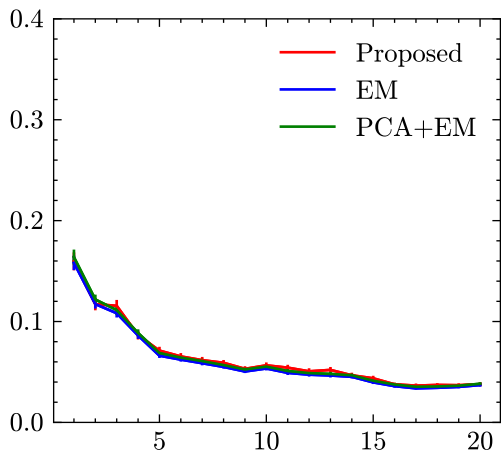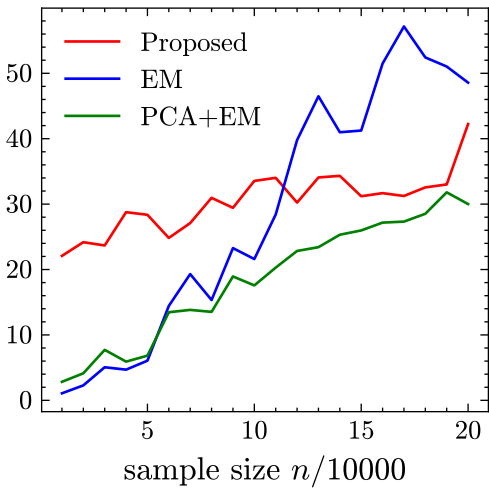

Supplement: supplementary_material [file attachment]
